# Supplementary material for: Electron ionization mass spectrometric analysis of air- and moisture-sensitive organometallic compounds
Source: Royal Society of Chemistry journal article supplement (doi:10.1039/c6dt03020c), 2016-01-01
Supplement: c6dt03020c1.pdf [file c6dt03020c1.pdf]

**Supporting information**  
**Electron ionization mass spectrometric analysis of air- and moisture-sensitive organometallic compounds**

Johanne Penafiel, Amelia V. Hesketh, Ori Granot\* and J. Scott McIndoe\*

*Department of Chemistry, University of Victoria, P.O. Box 3065 Victoria, BC V8W3V6, Canada.*

*Fax: +1 (250) 721-7147; Tel: +1 (250) 721-7181; E-mail: [orig@uvic.ca](mailto:orig@uvic.ca), [mcindoe@uvic.ca](mailto:mcindoe@uvic.ca)*

**Supplementary EI Mass Spectra**

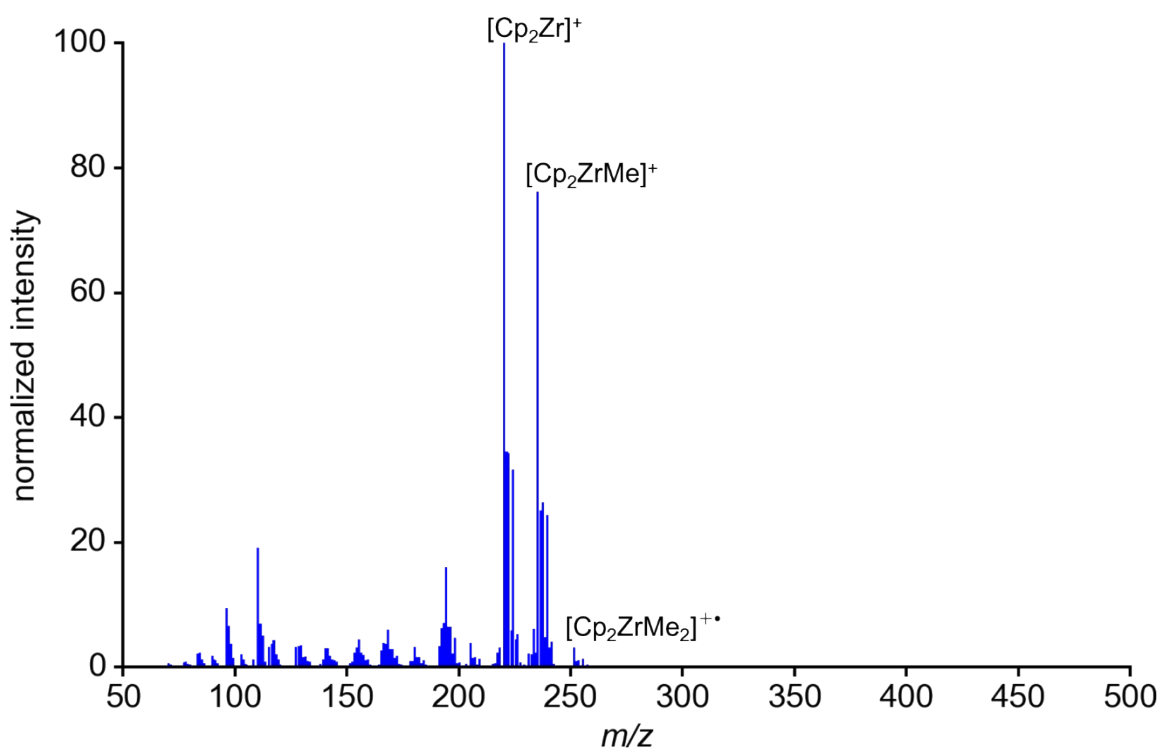

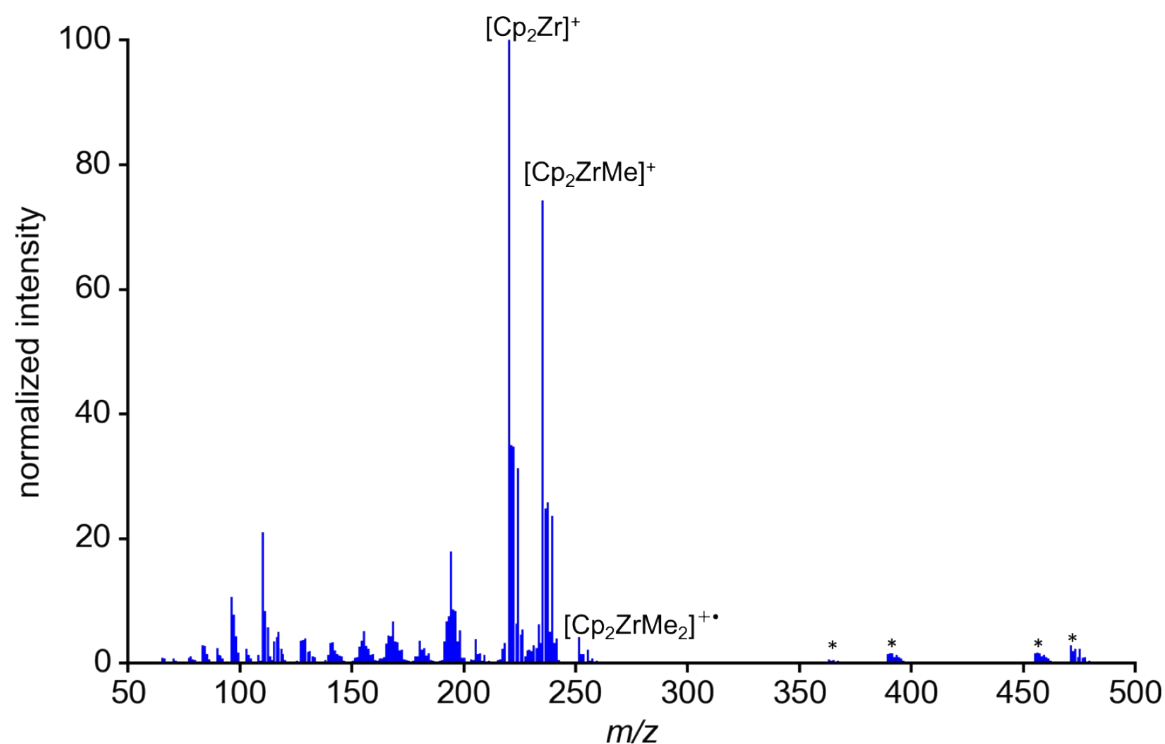

Figure SI 1. EI-MS spectrum of  $\text{ZrCp}_2\text{Me}_2$  ( $m/z$  250). Top: Spectrum obtained using the glove chamber. Bottom: The measurement was performed under air (no glove chamber). Peaks marked \* are unassigned decomposition products.

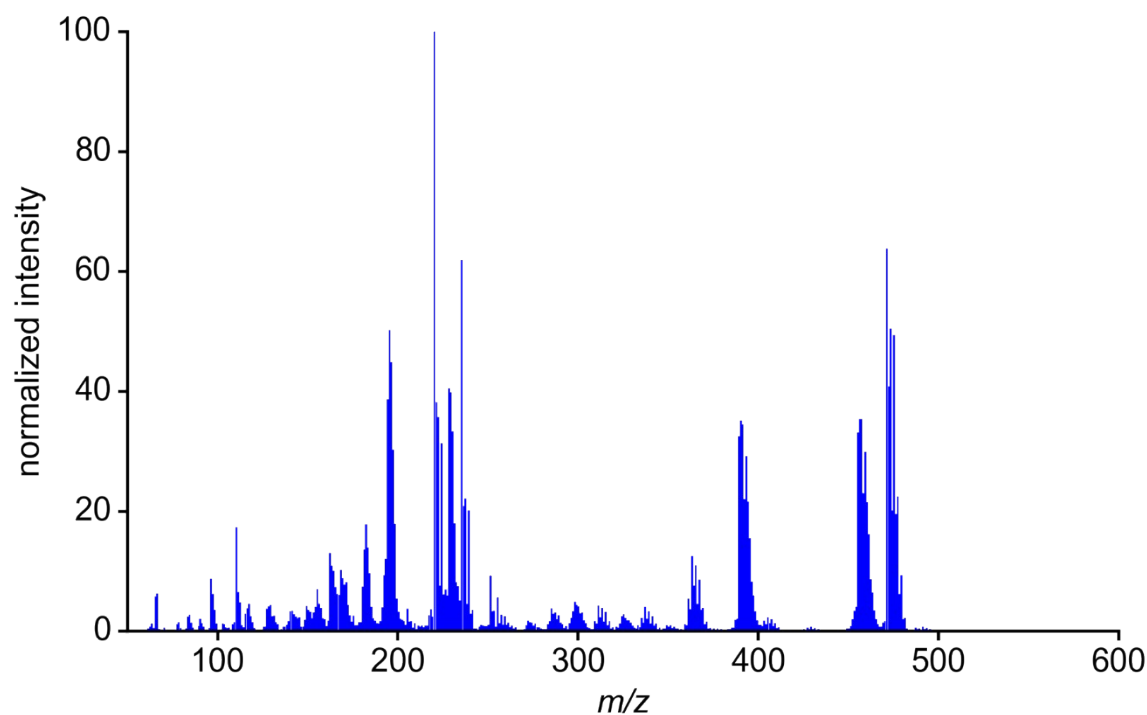

Figure SI 2. EI-MS spectrum of  $\text{ZrCp}_2\text{Me}_2$  ( $m/z$  250). The sample was exposed to air 45 min before measurement, which was performed under air (no glove chamber). Undefined dimeric oxidized products with abundant fragments at  $m/z$  390,  $m/z$  474 and  $m/z$  487 were observed.

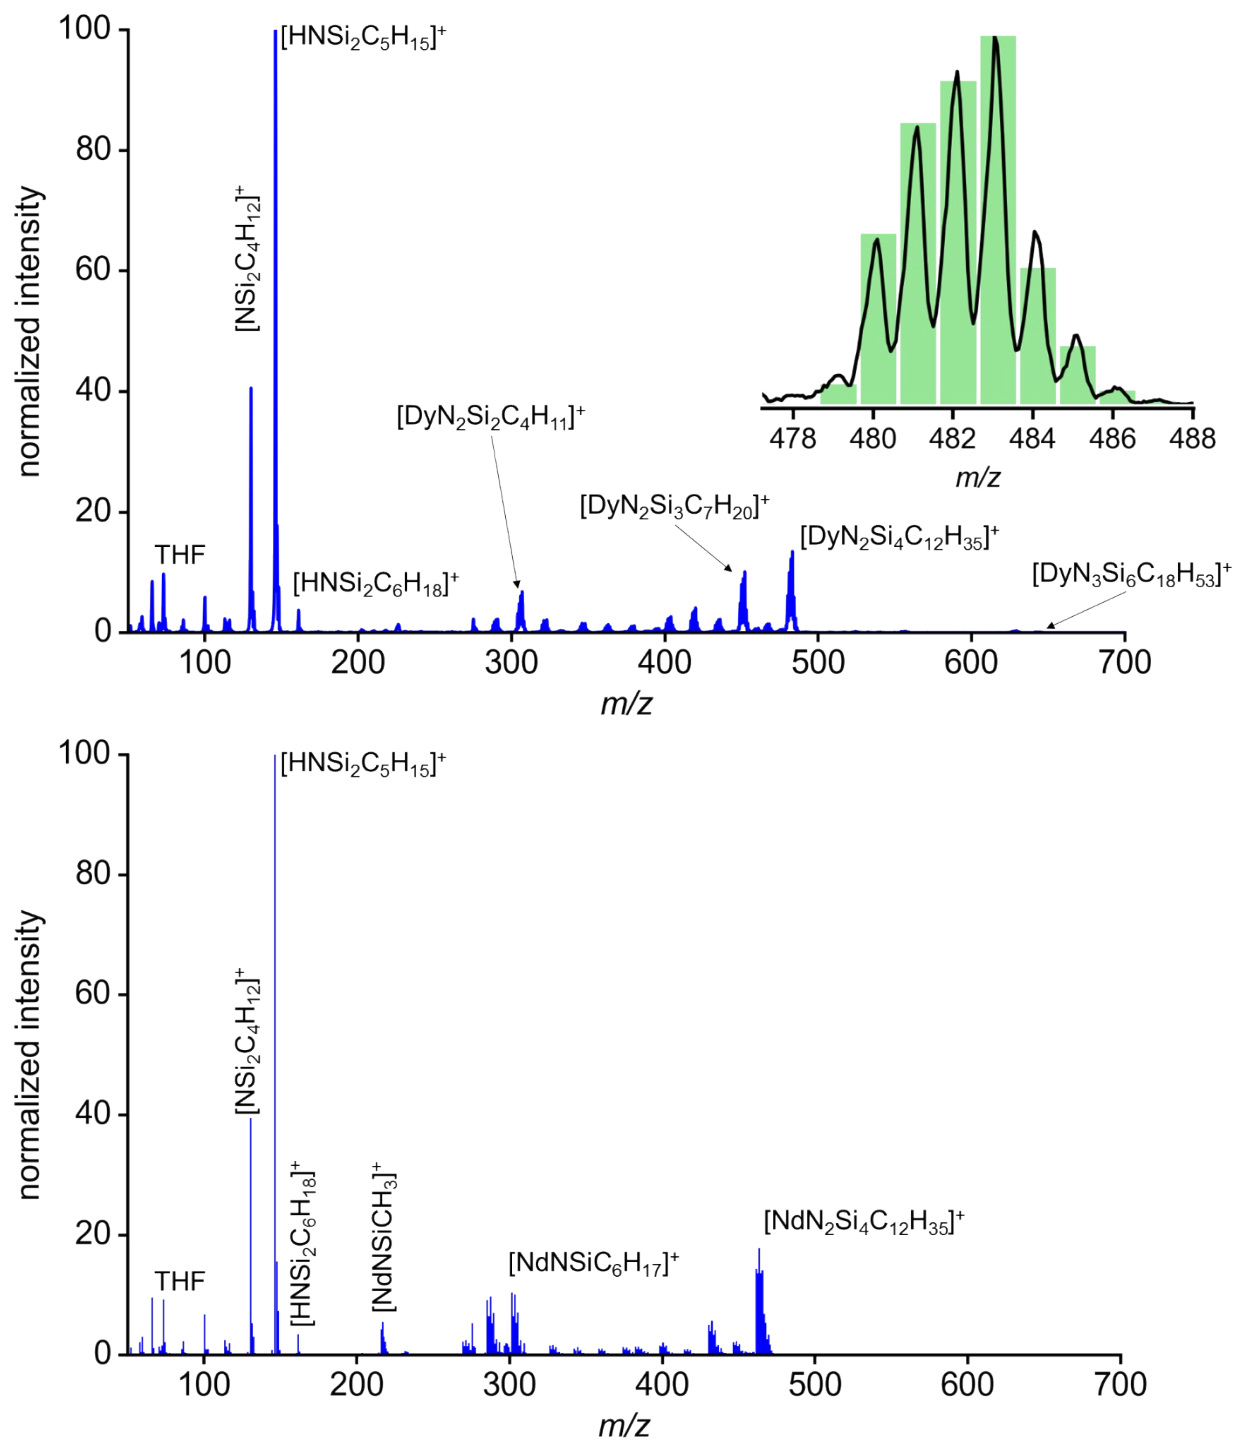

Figure SI 3. EI-MS spectra of  $\text{Dy}[\text{N}(\text{TMS})_2]_3$  (top) and  $\text{Nd}[\text{N}(\text{TMS})_2]_3$  (bottom) using the glove chamber. Inset: actual spectrum (black) and predicted isotope pattern (green bars).

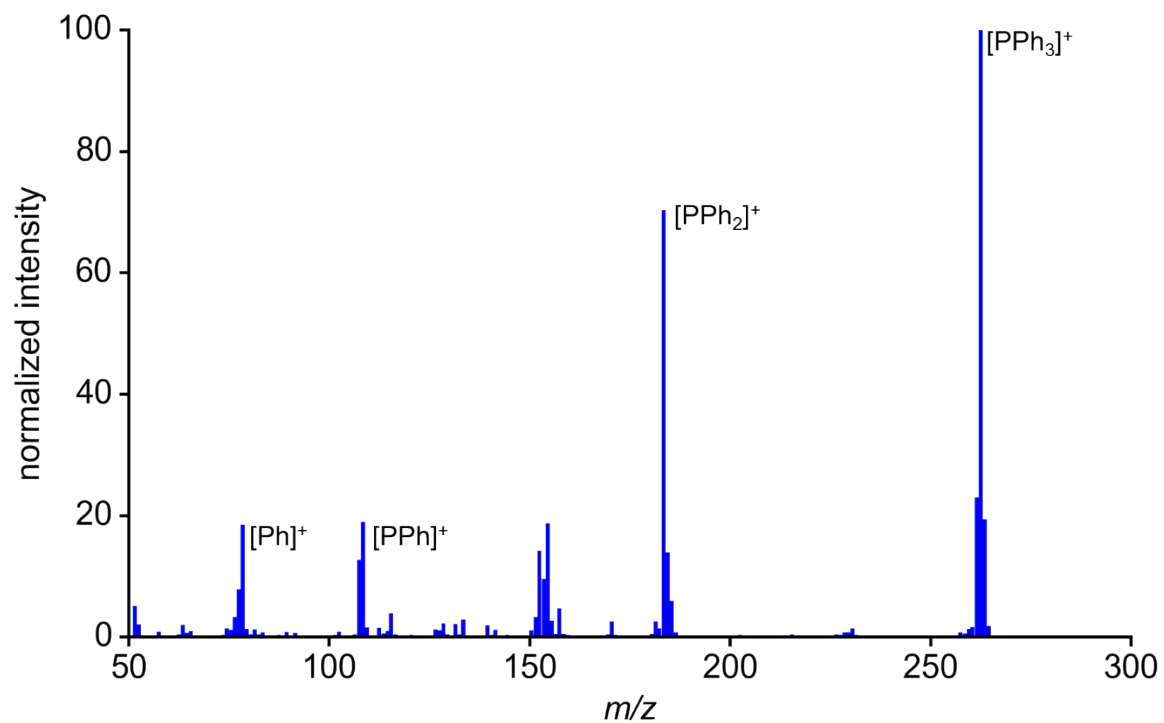

Figure SI 4. EI-MS spectra of  $\text{Rh}(\text{PPh}_3)_3\text{Cl}$  using the glove chamber. The spectra shows fragments at  $m/z$  262,  $m/z$  184,  $m/z$  108 and  $m/z$  77 which are characteristic for triphenylphosphine. This suggests that the poor thermal stability of the Wilkinson's catalyst do not allow for EI-MS analysis.
